# Supplementary material
Source: publisher figshare collection journal article supplement (https://tandf.figshare.com/articles/dataset/_/23666331)
Supplement: Supplementary file 1 [file 1]

# A Unified Model Specification for Sparse and Dense Functional/Longitudinal Data

## Supplementary Material

### S1 Proof of Main Results

**Lemma 1.** *Under the conditions of Theorem 1, we have*

$$\sqrt{n}(\tilde{\alpha} - \alpha) = O_p(1).$$

*Proof.* Similar to the procedure of Lemma 2 in the supplement materials of Liu et al. (2022), we can show that

$$\frac{1}{n} \sum_{i=1}^n \hat{S}_i \hat{S}_i^\tau = \frac{1}{n} \sum_{i=1}^n S_i S_i^\tau + O_p\left(\sup_{1 \leq k \leq p} \sup_{x \in [a_k, b_k]} |\hat{\beta}_k - \beta_k|\right),$$

which implies that  $\lim_{n \rightarrow \infty} \frac{1}{n} \sum_{i=1}^n E[\hat{S}_i \hat{S}_i^\tau] = \Omega$ . Under Assumption T2, it holds that  $\frac{1}{n} \sum_{i=1}^n \hat{S}_i \hat{S}_i^\tau$  is invertible with probability approaching to one. According to the formula of  $\tilde{\alpha}$  given by (3) in the main body, we obtain that

$$\tilde{\alpha} = \left( \sum_{i=1}^n \hat{S}_i \hat{S}_i^\tau \right)^{-1} \sum_{i=1}^n \hat{S}_i \delta_i = \alpha + \left( \sum_{i=1}^n \hat{S}_i \hat{S}_i^\tau \right)^{-1} \sum_{i=1}^n \hat{S}_i \delta_i,$$

where  $\delta_i = (\delta_{i1}, \dots, \delta_{im_i})^\tau$ . Let  $\hat{S}_{i,j}^{\otimes 2}$  be the  $(i, j)$ -element of the matrix  $\sum_{i=1}^n \hat{S}_i \hat{S}_i^\tau$ . Employing Theorem 3 in Liu et al. (2022), we have

$$\begin{aligned} \text{Var}\left(\frac{1}{n} \sum_{i=1}^n \hat{S}_i \delta_i\right) &= \frac{1}{n^2} \sum_{i=1}^n \sum_{i=1}^n E[\delta_i^\tau \hat{S}_i \hat{S}_i^\tau \delta_i] \\ &= \frac{1}{n^2} \sum_{i=1}^n \sum_{k=1}^{m_i} E[\delta_{ik} \hat{S}_{k,k}^{\otimes 2}] + \frac{1}{n^2} \sum_{i=1}^n \sum_{k \neq l}^{m_i} E[\delta_{ik} \delta_{il} \hat{S}_{k,l}^{\otimes 2}] \\ &= \frac{1}{n^2} \sum_{i=1}^n \sum_{k=1}^{m_i} E[E[\delta_{ik}^2 | T_{ij}] \hat{S}_{k,k}^{\otimes 2}] + \frac{1}{n^2} \sum_{i=1}^n \sum_{k \neq l}^{m_i} E[E[\delta_{ik} \delta_{il} | T_{ij}] \hat{S}_{k,l}^{\otimes 2}] \\ &\leq c_1 \frac{1}{n} \text{tr} E\left[\frac{1}{n} \sum_{i=1}^n \hat{S}_i \hat{S}_i^\tau\right] + c_2 \frac{1}{n} \left\| \frac{1}{n} \sum_{i=1}^n \hat{S}_i \hat{S}_i^\tau \right\|_F \\ &= O_p(1/n) + o_p(1), \end{aligned}$$

which completes the proof.  $\square$

**Proof of Theorem 1.**

*Proof.* Denote  $\mathbf{Y}_i = \{Y_{i1}, \dots, Y_{im_i}\}^\tau$ ,  $\tilde{\mathbf{e}}_i = \tilde{\mathbf{g}}_{0,i} - \mathbf{g}_{0,i}$ , where

$$\begin{aligned}\mathbf{g}_{0,i} &= \{g_0(T_{i1}, \mathbf{Z}_{i1}, \mathbf{X}_{i1}; \boldsymbol{\alpha}), \dots, g_0(T_{im_i}, \mathbf{Z}_{im_i}, \mathbf{X}_{im_i}; \boldsymbol{\alpha}, \boldsymbol{\beta}(\mathbf{x}))\}^\tau \quad \text{and} \\ \tilde{\mathbf{g}}_{0,i} &= \{g_0(T_{i1}, \mathbf{Z}_{i1}, \mathbf{X}_{i1}; \tilde{\boldsymbol{\alpha}}), \dots, g_0(T_{im_i}, \mathbf{Z}_{im_i}, \mathbf{X}_{im_i}; \tilde{\boldsymbol{\alpha}}, \hat{\boldsymbol{\beta}}(\mathbf{x}))\}^\tau.\end{aligned}$$

Since  $\hat{\mathbf{e}}_i = \mathbf{Y}_i - \tilde{\mathbf{g}}_{0,i} = \boldsymbol{\delta}_i - (\tilde{\mathbf{g}}_{0,i} - \mathbf{g}_{0,i}) = \boldsymbol{\delta}_i - \tilde{\mathbf{e}}_i$ , we can write  $\hat{J}_n = \hat{J}_{n,1} - 2\hat{J}_{n,2} + \hat{J}_{n,3}$ , where

$$\hat{J}_{n,1} = \frac{1}{n^2 \bar{N}_H^2 |H|} \sum_{i=1}^n \sum_{j \neq i}^n \boldsymbol{\delta}_i^\tau W_{ij} \boldsymbol{\delta}_j, \quad (\text{S1.2})$$

$$\hat{J}_{n,2} = \frac{1}{n^2 \bar{N}_H^2 |H|} \sum_{i=1}^n \sum_{j \neq i}^n \boldsymbol{\delta}_i^\tau W_{ij} \tilde{\mathbf{e}}_j, \quad (\text{S1.3})$$

$$\hat{J}_{n,3} = \frac{1}{n^2 \bar{N}_H^2 |H|} \sum_{i=1}^n \sum_{j \neq i}^n \tilde{\mathbf{e}}_i^\tau W_{ij} \tilde{\mathbf{e}}_j. \quad (\text{S1.4})$$

It suffices to show that

$$\frac{n^2 \bar{N}_H^2}{\sqrt{N^2 - n \bar{N}_2}} \sqrt{|H|} \hat{J}_{n,1} / \sigma_1 \xrightarrow{D} N(0, 1), \quad (\text{S1.5})$$

$$\hat{J}_{n,2} = o_p \left( \frac{1}{n \bar{N}_H \sqrt{|H|}} \right), \quad (\text{S1.6})$$

$$\hat{J}_{n,3} = o_p \left( \frac{1}{n \bar{N}_H \sqrt{|H|}} \right) \quad \text{and} \quad (\text{S1.7})$$

$$\hat{\sigma}_1^2 \xrightarrow{p} \sigma_1^2 \quad (\text{S1.8})$$

under  $H_{0,C}$ .

On the other hand, the condition  $\lim_n \sup \bar{N}_2 / (\bar{N}_H)^2 < \infty$  implies  $\bar{N}_2 = O(\bar{N}_H^2)$ . By the convex inequality, it holds that

$$\left( \frac{1}{n} \sum_{i=1}^n m_i \right)^2 \leq \frac{1}{n} \sum_{i=1}^n m_i^2 = O(\bar{N}_H^2),$$

which means  $N = O(n\bar{N}_H)$ , and  $N^2 - n\bar{N}_2 = O(n(n-1)\bar{N}_H^2)$ . Therefore,

$$\frac{n^2\bar{N}_H^2}{\sqrt{N^2 - n\bar{N}_2}}\sqrt{|H|}\hat{J}_n/\hat{\sigma}_1 = \frac{\sigma_1}{\hat{\sigma}_1}\frac{n^2\bar{N}_H^2}{\sqrt{N^2 - n\bar{N}_2}}\sqrt{|H|}\hat{J}_{n,1}/\sigma_1 + o_p(1) \xrightarrow{D} N(0, 1),$$

which completes the proof.  $\square$

### Proof of (S1.5)

*Proof.* We write  $\hat{J}_{n,1} = \frac{1}{n^2\bar{N}_H^2|H|} \sum_{i=1}^n \eta_{in}$ , where  $\eta_{in} = \sum_{j \neq i}^n \boldsymbol{\delta}_i^T W_{ij} \boldsymbol{\delta}_j = 2 \sum_{j < i} \boldsymbol{\delta}_i^T W_{ij} \boldsymbol{\delta}_j$ . It is easy to see that  $\eta_{in}$  is a martingale difference (MD) process w.r.t. the filtration  $\mathcal{F}_i^n = \sigma((T_i, X_i)_{i=1}^n, \boldsymbol{\delta}_1, \dots, \boldsymbol{\delta}_n)$  and

$$\begin{aligned} s_n^2 &:= \sum_{i=1}^n \mathbb{E}[\eta_{in}^2] = 4 \sum_{i=1}^n \sum_{j < i}^n \mathbb{E}[\mathbb{E}(\boldsymbol{\delta}_i^T W_{ij} \boldsymbol{\delta}_j)^2 | \mathcal{J}_i, \mathcal{J}_j]] \\ &= 4 \sum_{i=1}^n \sum_{j < i}^n (\hat{J}_{n,11} + \hat{J}_{n,12} + \hat{J}_{n,13} + \hat{J}_{n,14}), \end{aligned}$$

where

$$\begin{aligned} \hat{J}_{n,11} &= \sum_{l=1}^{m_i} \sum_{v=1}^{m_j} \mathbb{E}[\mathbb{E}[\delta_{il}^2 | \mathcal{J}_i] \mathbb{E}[\delta_{jv}^2 | \mathcal{J}_j] (w_{ij}^{(l,v)})^2], \\ \hat{J}_{n,12} &= \sum_{l=1}^{m_i} \sum_{v \neq v'}^{m_j} \mathbb{E}[\mathbb{E}[\delta_{il} | \mathcal{J}_i] \mathbb{E}[\delta_{jv} \delta_{jv'} | \mathcal{J}_j] w_{ij}^{(l,v)} w_{ij}^{(l,v')}] \\ \hat{J}_{n,13} &= \sum_{l \neq l'}^{m_i} \sum_{v=1}^{m_j} \mathbb{E}[\mathbb{E}[\delta_{il} \delta_{il'} | \mathcal{J}_i] \mathbb{E}[\delta_{jv}^2 | \mathcal{J}_j] w_{ij}^{(l,v)} w_{ij}^{(l',v)}] \\ \hat{J}_{n,14} &= \sum_{l \neq l'}^{m_i} \sum_{v \neq v'}^{m_j} \mathbb{E}[\mathbb{E}[\delta_{il} \delta_{il'} | \mathcal{J}_i] \mathbb{E}[\delta_{jv} \delta_{jv'} | \mathcal{J}_j] w_{ij}^{(l,v)} w_{ij}^{(l',v')}] \end{aligned}$$

According to (C.8) and (C.9) in the supplement materials of Liu et al. (2022),

after a straightforward computation, we obtain that

$$\begin{aligned}
\hat{J}_{n,11} &= m_i m_j \kappa^{p+1} |H| \mathbb{E} [\{\gamma(T, T) + \sigma^2(T)\}^2 f_T(T)] \prod_{k=1}^p \mathbb{E} [f_k(X_k(T); T)] \\
&\triangleq m_i m_j \kappa^{p+1} |H| \Delta_1, \\
\hat{J}_{n,12} &= m_i m_j (m_j - 1) |H|^2 \mathbb{E} [\{\gamma(T, T) + \sigma^2(T)\} \gamma(T, T) f_T^2(T)] \prod_{k=1}^p \mathbb{E} [f_k^2(X_k(T); T)] \\
&\triangleq m_i m_j (m_j - 1) |H|^2 \Delta_2, \\
\hat{J}_{n,13} &= m_i m_j (m_i - 1) |H|^2 \mathbb{E} [\{\gamma(T, T) + \sigma^2(T)\} \gamma(T, T) f_T^2(T)] \prod_{k=1}^p \mathbb{E} [f_k^2(X_k(T); T)] \\
&\triangleq m_i m_j (m_i - 1) |H|^2 \Delta_3, \\
\hat{J}_{n,14} &= m_i m_j (m_i - 1) (m_j - 1) |H|^2 \mathbb{E} [\gamma^2(T, T) f_T(T)] \prod_{k=1}^p (\mathbb{E} [f_k(X_k(T); T)])^2 \\
&\triangleq m_i m_j (m_i - 1) (m_j - 1) |H|^2 \Delta_4.
\end{aligned}$$

Note that  $2 \sum_{i=1}^n \sum_{j \neq i}^n m_i m_j = N^2 - n \bar{N}_2$ , where  $\bar{N}_2 = \frac{1}{n} \sum_{i=1}^n m_i^2$ . Furthermore,

$$\begin{aligned}
\sum_{i=1}^n \sum_{j \neq i}^n m_i m_j (m_i - 1) &\leq \sum_{i=1}^n m_i^2 \sum_{j=1}^n m_j = n N \bar{N}_2 = O(n^2 \bar{N}_H^3), \\
\sum_{i=1}^n \sum_{j \neq i}^n m_i m_j (m_i - 1) (m_j - 1) &\leq \left( \sum_{i=1}^n m_i^2 \right)^2 = (n \bar{N}_2)^2 = O(n^2 \bar{N}_H^4).
\end{aligned}$$

Therefore,

$$\begin{aligned}
s_n^2 &= 2 \sum_{i=1}^n \sum_{j \neq i}^n m_i m_j \kappa^{p+1} |H| \Delta_1 + 2 \sum_{i=1}^n \sum_{j \neq i}^n m_i m_j (m_i - 1) |H|^2 \Delta_2 \\
&\quad + 2 \sum_{i=1}^n \sum_{j \neq i}^n m_i m_j (m_j - 1) |H|^2 \Delta_3 + 2 \sum_{i=1}^n \sum_{j \neq i}^n m_i m_j (m_i - 1) (m_j - 1) |H|^2 \Delta_4 \\
&= (N^2 - n \bar{N}_2) \kappa^{p+1} |H| \Delta_1 + O(n^2 \bar{N}_H^3 |H|^2) + O(n^2 \bar{N}_H^4 |H|^2) \\
&= (N^2 - n \bar{N}_2) |H| \sigma_0^2 + s.o.
\end{aligned}$$

since  $\bar{N}_H^2|H| = o(1)$ . Hence,

$$\text{Var}(\hat{J}_{n,1}) = \frac{N^2 - n\bar{N}_2}{n^4\bar{N}_H^4|H|} \sigma_0^2$$

with  $\sigma_0^2 = \kappa^{p+1} \mathbb{E}[\{\gamma(T, T) + \sigma^2(T)\}^2 f_T(T)] \Pi_{k=1}^p \mathbb{E}[f_k(X_k(T); T)]$ .

Now, we consider  $\frac{n^2\bar{N}_H^2}{\sqrt{N^2 - n\bar{N}_2}} \sqrt{|H|} \hat{J}_n / \sigma_0 = \sum_{i=1}^n \zeta_{in}$ , where  $\zeta_{in} = \eta_{in} / s_n$  and  $s_n^2 = (N^2 - n\bar{N}_2)|H|\sigma_0^2$ . To derive the asymptotic normality of  $\sum_{i=1}^n \zeta_{in}$ , it remains to show the following three conditions in Lemma D1 of Jun and Pinkse (2012):

- (i)  $\sup_n \mathbb{E}[\max_i \zeta_{in}^2] < \infty$ ,
- (ii)  $\sum_{i=1}^n \zeta_{in}^2 \xrightarrow{p} 1$ , and
- (iii)  $\max_i |\zeta_{in}| \xrightarrow{p} 0$ .

It is obvious that (i) holds since  $\max_i \zeta_{in}^2 \leq \sum_{i=1}^n \eta_{in}^2 / s_n^2$  and  $s_n^2 = \sum_{i=1}^n \mathbb{E}[\eta_{in}^2] + o(1)$ . By Markov's inequality, it follows that

$$\mathbb{P}(\max_i |\zeta_{in}| > \varepsilon) \leq \sum_{i=1}^n \mathbb{P}(|\zeta_{in}| > \varepsilon) \leq \frac{1}{\varepsilon^r} \sum_{i=1}^n \mathbb{E}[|\zeta_{in}|^r]. \quad (\text{S1.9})$$

Note that

$$\mathbb{E}[|\zeta_{in}|^r] = \frac{1}{s_n^r} \mathbb{E}[|\eta_{in}|^r] = \frac{1}{s_n^r} \mathbb{E}\left[\left|\sum_{j<i}^n \boldsymbol{\delta}_i^\tau W_{ij} \boldsymbol{\delta}_j\right|^r\right].$$

Obviously,  $s_n^r = O(\{N^2 - n\bar{N}_2\}|H|^{r/2}) = O(\{n(n-1)\bar{N}_H^2|H|\}^{r/2})$ . On the other hand, using  $C_r$  inequality and Assumption E3, we obtain that

$$\begin{aligned} \sum_{j<i} \mathbb{E}[|\boldsymbol{\delta}_i^\tau W_{ij} \boldsymbol{\delta}_j|^r] &= \sum_{j<i} \mathbb{E}\left[\left|\sum_{l=1}^{m_i} \sum_{v=1}^{m_j} \delta_{il} w_{ij}^{(l,v)} \delta_{jv}\right|^r\right] \\ &\leq \sum_{j<i} \sum_{l=1}^{m_i} \sum_{v=1}^{m_j} \mathbb{E}|\delta_{il} w_{ij}^{(l,v)} \delta_{jv}|^r \\ &\leq C \sum_{j<i} \sum_{l=1}^{m_i} \sum_{v=1}^{m_j} \mathbb{E}[k_{h_C}^r(T_{il}, T_{jv}) K_{h_A}^r(\mathbf{X}_{il}, \mathbf{X}_{jv})] \\ &= O\left(\sum_{j<i}^n m_i m_j |H|\right). \end{aligned}$$

Therefore,

$$\sum_{i=1}^n \mathbb{E}[|\zeta_{in}|^r] = O(\{n^2 \bar{N}_{\mathbb{H}}^2 |H|\}^{-\frac{r-2}{2}}) = o(1) \quad (\text{S1.10})$$

for  $r > 2$ , which shows that (iii) from (S1.9). Furthermore, by Burkholder inequality and  $C_r$  inequality, we have that

$$\begin{aligned} \mathbb{P}\left(\left|\sum_{i=1}^n \zeta_{in}^2 - 1\right| > \varepsilon\right) &= \mathbb{P}\left(\left|\sum_{i=1}^n \zeta_{in}^2 - \mathbb{E}[\zeta_{in}^2 | \mathcal{J}_i]\right| > \varepsilon\right) \\ &\leq \frac{1}{\varepsilon^{r/2}} \mathbb{E}\left[\left|\sum_{i=1}^n \zeta_{in}^2 - \mathbb{E}[\zeta_{in}^2 | \mathcal{J}_i]\right|^{r/2}\right] \\ &\leq \frac{1}{\varepsilon^{r/2}} \mathbb{E}\left[\left\{\sum_{i=1}^n \zeta_{in}^2\right\}^{r/2}\right] \leq \frac{1}{\varepsilon^{r/2}} \mathbb{E}\left[\left|\sum_{i=1}^n \zeta_{in}\right|^r\right] \\ &\leq \frac{1}{\varepsilon^{r/2}} \sum_{i=1}^n \mathbb{E}[|\zeta_{in}|^r] \rightarrow 0 \end{aligned}$$

which shows condition (ii). Hence, we complete the proof of (S1.5).  $\square$

**Proof of (S1.6)**

*Proof.* Let  $\tilde{\mathbf{e}}_{i,j}$  be the  $j$ -th element of  $\tilde{\mathbf{e}}_i$ , which is given by

$$\begin{aligned} \tilde{\mathbf{e}}_{i,j} &= \mathbf{Z}_{ij}^\tau (\tilde{\boldsymbol{\alpha}}_0 - \boldsymbol{\alpha}_0) + \sum_{k=1}^p (\tilde{\alpha}_k - \alpha_k) \beta_k(X_{ijk}) \\ &\quad + \sum_{k=1}^p \alpha_k [\hat{\beta}_k(X_{ijk}) - \beta_k(X_{ijk})] + \sum_{k=1}^p (\tilde{\alpha}_k - \alpha_k) [\hat{\beta}_k(X_{ijk}) - \beta_k(X_{ijk})]. \end{aligned} \quad (\text{S1.11})$$

Represent  $\hat{\boldsymbol{\beta}}_{i,k} = \{\hat{\beta}_k(X_{i1k}), \dots, \hat{\beta}_k(X_{im_ik})\}^\tau$  and  $\boldsymbol{\beta}_{i,k} = \{\beta_k(X_{i1k}), \dots, \beta_k(X_{im_ik})\}^\tau$ ,

then we can write  $\hat{J}_{n,2} = \hat{J}_{n,21} + \hat{J}_{n,22} + \hat{J}_{n,23} + \hat{J}_{n,24}$ , where

$$\begin{aligned}\hat{J}_{n,21} &= \frac{1}{n^2 \bar{N}_H^2 |H|} \sum_{i=1}^n \sum_{j \neq i}^n \boldsymbol{\delta}_i^\tau W_{ij} \mathbf{Z}_{ij}^\tau (\tilde{\boldsymbol{\alpha}}_0 - \boldsymbol{\alpha}_0), \\ \hat{J}_{n,22} &= \frac{1}{n^2 \bar{N}_H^2 |H|} \sum_{k=1}^p \sum_{i=1}^n \sum_{j \neq i}^n \boldsymbol{\delta}_i^\tau W_{ij} (\tilde{\alpha}_k - \alpha_k) \boldsymbol{\beta}_{j,k}, \\ \hat{J}_{n,23} &= \frac{1}{n^2 \bar{N}_H^2 |H|} \sum_{k=1}^p \sum_{i=1}^n \sum_{j \neq i}^n \boldsymbol{\delta}_i^\tau W_{ij} \alpha_k (\hat{\boldsymbol{\beta}}_{j,k} - \boldsymbol{\beta}_{j,k}), \quad \text{and} \\ \hat{J}_{n,24} &= \frac{1}{n^2 \bar{N}_H^2 |H|} \sum_{i=1}^n \sum_{j \neq i}^n \boldsymbol{\delta}_i^\tau W_{ij} (\tilde{\alpha}_k - \alpha_k) (\hat{\boldsymbol{\beta}}_{j,k} - \boldsymbol{\beta}_{j,k}).\end{aligned}$$

Using Lemma 1, we get

$$\begin{aligned}\text{Var}(\hat{J}_{n,21}) &= \frac{1}{n^5 \bar{N}_H^4 |H|^2} \sum_{i=1}^n \sum_{j \neq i}^n \mathbb{E} [\boldsymbol{\delta}_i^\tau W_{ij} \mathbf{Z}_{ij}^\tau \mathbf{1}_{m_j}]^2 \\ &\leq C \frac{1}{n^5 \bar{N}_H^4 |H|^2} \sum_{i=1}^n \sum_{j \neq i}^n \sum_{l=1}^{m_i} \sum_{v=1}^{m_j} \sum_{l'=1}^{m_i} \sum_{v'=1}^{m_j} \mathbb{E} [\delta_{il} \delta_{il'} w_{ij}^{(l,v)} w_{ij}^{(l',v')}] \\ &= O_p \left( \frac{n(n-1) \bar{N}_H^2 |H|}{n^5 \bar{N}_H^4 |H|^2} \right) = o_p \left( \frac{1}{n^2 \bar{N}_H^2 |H|} \right),\end{aligned}$$

which implies that  $\hat{J}_{n,21} = o_p \left( \frac{1}{n \bar{N}_H \sqrt{|H|}} \right)$ . Similarly, it holds that  $\hat{J}_{n,22} = o_p \left( \frac{1}{n \bar{N}_H \sqrt{|H|}} \right)$ .

Next, according to (C.26) and (C.29) in the supplement materials of Liu et al. (2022), we obtain that

$$\begin{aligned}\hat{J}_{n,23} &= \frac{1}{n^2 \bar{N}_H^2 |H|} \sum_{k=1}^p \sum_{i=1}^n \sum_{j \neq i}^n \boldsymbol{\delta}_i^\tau W_{ij} \alpha_k \begin{pmatrix} \mathbf{e}_1^\tau \{\hat{\mathbf{r}}_k(X_{j1}) - \mathbf{r}_k(X_{j1})\} \\ \vdots \\ \mathbf{e}_1^\tau \{\hat{\mathbf{r}}_k(X_{jm_j}) - \mathbf{r}_k(X_{jm_j})\} \end{pmatrix} \\ &= \frac{1}{n^2 \bar{N}_H^2 |H|} \sum_{i=1}^n \sum_{j \neq i}^n \boldsymbol{\delta}_i^\tau W_{ij} \alpha_k \left\{ O(h_A^2) + O_p \left( \sqrt{\frac{1}{n \bar{N}_H h_A}} + \frac{1}{n} \right) \right\} \\ &= o_p \left( \frac{1}{n \bar{N}_H \sqrt{|H|}} \right).\end{aligned}$$

Here, the last step uses the fact that  $\sum_{i=1}^n \sum_{j \neq i}^n \boldsymbol{\delta}_i^\tau W_{ij} = O_p\left(\sqrt{n(n-1)\bar{N}_H^2|H|}\right)$ . Similarly,  $\hat{J}_{n,24} = o_p\left(\sqrt{n(n-1)\bar{N}_H^2|H|}\right)$ . Hence, (S1.6) is shown.  $\square$

**Proof of (S1.7)**

*Proof.* From the definition of  $\tilde{\mathbf{e}}_{i,j}$  given in (S1.11), we can write  $\hat{J}_{n,3} = \hat{J}_{n,31} + \hat{J}_{n,32} + \hat{J}_{n,33} + \hat{J}_{n,34} + \hat{J}_{n,35} + (s.o.)$ , where

$$\begin{aligned} J_{n,31} &= \frac{1}{n^2 \bar{N}_H^2 |H|} \sum_{i=1}^n \sum_{j \neq i}^n (\tilde{\boldsymbol{\alpha}}_0 - \boldsymbol{\alpha}_0)^\tau \mathbf{Z}_{ij} \mathbf{1}_{m_i}^\tau W_{ij} \mathbf{Z}_{ij}^\tau (\tilde{\boldsymbol{\alpha}}_0 - \boldsymbol{\alpha}_0) \mathbf{1}_{m_j}, \\ J_{n,32} &= \frac{1}{n^2 \bar{N}_H^2 |H|} \sum_{k=1}^p \sum_{i=1}^n \sum_{j \neq i}^n (\tilde{\alpha}_k - \alpha_k)^2 \boldsymbol{\beta}_{i,k}^\tau W_{ij} \boldsymbol{\beta}_{j,k}, \\ J_{n,33} &= \frac{1}{n^2 \bar{N}_H^2 |H|} \sum_{k=1}^p \sum_{i=1}^n \sum_{j \neq i}^n \alpha_k^2 \left( \hat{\boldsymbol{\beta}}_{i,k} - \boldsymbol{\beta}_{i,k} \right)^\tau W_{ij} \left( \hat{\boldsymbol{\beta}}_{j,k} - \boldsymbol{\beta}_{j,k} \right), \\ J_{n,34} &= \frac{2}{n^2 \bar{N}_H^2 |H|} \sum_{k=1}^p \sum_{i=1}^n \sum_{j \neq i}^n (\tilde{\boldsymbol{\alpha}}_0 - \boldsymbol{\alpha}_0)^\tau \mathbf{Z}_{ij} \mathbf{1}_{m_i} W_{ij} \left( \hat{\boldsymbol{\beta}}_{j,k} - \boldsymbol{\beta}_{j,k} \right) \alpha_k \\ J_{n,35} &= \frac{2}{n^2 \bar{N}_H^2 |H|} \sum_{k=1}^p \sum_{i=1}^n \sum_{j \neq i}^n (\tilde{\alpha}_k - \alpha_k) \boldsymbol{\beta}_{i,k}^\tau W_{ij} \left( \hat{\boldsymbol{\beta}}_{j,k} - \boldsymbol{\beta}_{j,k} \right). \end{aligned}$$

After direct computation, we obtain that  $\hat{J}_{n,31} = O_p(1/n)$ ,  $\hat{J}_{n,32} = O_p(1/n)$ ,  $\hat{J}_{n,33} = O_p(h_A^4)$ ,  $\hat{J}_{n,34} = o_p(1/\sqrt{n})$ , and  $\hat{J}_{n,35} = o_p(1/n)$ . By Assumption T3, we have that  $\hat{J}_{n,3} = o_p\left(\frac{1}{n\bar{N}_H\sqrt{|H|}}\right)$ , which shows that (S1.7) holds.  $\square$

**Proof of (S1.8)**

*Proof.* By the proof of (S1.5), the leading term of  $\hat{\sigma}_1^2$  is given by

$$\tilde{\sigma}_1^2 = \frac{1}{n^2 \bar{N}_H^2 |H|} \sum_{i=1}^n \sum_{j \neq i}^n \sum_{l=1}^{m_i} \sum_{v=1}^{m_j} \delta_{il}^2 \delta_{jv}^2 \left\{ w_{ij}^{(l,v)} \right\}^2 = \frac{1}{n^2 \bar{N}_H^2 |H|} \sum_{i=1}^n \sum_{j \neq i}^n H_{i,j},$$

where the form of  $H_{i,j}$  is obvious.



After straightforward computation, we obtain that

$$\begin{aligned}
\text{Var}(\tilde{\sigma}_1^2) &\leq \text{E}[\hat{\sigma}_1^4] = \frac{1}{n^4 \bar{N}_H^4 |H|^2} \sum_{i=1}^n \sum_{j \neq i}^n H_{i,j}^2 = \frac{n(n-1) \bar{N}_H^2}{n^4 \bar{N}_H^4 |H|^2} |H| + o_p(1) \\
&= O_p\left(\frac{1}{n^2 \bar{N}_H^2 |H|}\right) = o_p(1), \quad \text{and} \\
\text{E}[\tilde{\sigma}_1^2] &= \frac{1}{n^2 \bar{N}_H^2 |H|} \sum_{i=1}^n \sum_{j \neq i}^n \sum_{l=1}^{m_i} \sum_{v=1}^{m_j} \text{E}\left[\delta_{il}^2 \delta_{jv}^2 \left\{w_{ij}^{(l,v)}\right\}^2\right] \\
&= \frac{n(n-1) \bar{N}_H^2}{n^2 \bar{N}_H^2 |H|} |H| \sigma_1^2 + o_p(1).
\end{aligned}$$

Therefore,  $\tilde{\sigma}_1^2 = \text{E}[\tilde{\sigma}_1^2] + o_p(1) \xrightarrow{p} \sigma_1^2$ . Since  $\hat{\sigma}_1^2 \xrightarrow{p} \tilde{\sigma}_1^2$ , we finish the proof.  $\square$

### Proof of Theorem 2.

*Proof.* Under  $H_{1,C}$ ,

$$\hat{e}_{ij} = Y_{ij} - g_0(T_{ij}, \mathbf{Z}_{ij}, \mathbf{X}_{ij}; \tilde{\boldsymbol{\alpha}}, \hat{\boldsymbol{\beta}}(\mathbf{X}_{ij})) = \Delta(T_{ij}, \mathbf{Z}_{ij}, \mathbf{X}_{ij}) - \tilde{e}_{ij} + \delta_{ij},$$

where  $\Delta(t, \mathbf{z}, \mathbf{x}) = g(t, \mathbf{z}, \mathbf{x}; \boldsymbol{\alpha}(t), \boldsymbol{\beta}(\mathbf{x})) - g_0(t, \mathbf{z}, \mathbf{x}; \boldsymbol{\alpha}, \boldsymbol{\beta}(\mathbf{x}))$ . Let  $\boldsymbol{\Delta}_i = (\Delta_{i1}, \dots, \Delta_{im_i})^\tau$  with  $\Delta_{ij} := \Delta(T_{ij}, \mathbf{Z}_{ij}, \mathbf{X}_{ij})$ , then

$$\begin{aligned}
\hat{J}_n &= \frac{1}{n^2 \bar{N}_H^2 |H|} \sum_{i=1}^n \sum_{j \neq i}^n \hat{\mathbf{e}}_i^\tau W_{ij} \hat{\mathbf{e}}_j = \frac{1}{n^2 \bar{N}_H^2 |H|} \sum_{i=1}^n \sum_{j \neq i}^n (\boldsymbol{\Delta}_i - \tilde{\mathbf{e}}_i + \boldsymbol{\delta}_i)^\tau W_{ij} (\boldsymbol{\Delta}_j - \tilde{\mathbf{e}}_j + \boldsymbol{\delta}_j) \\
&= \hat{J}_{n,1} - 2\hat{J}_{n,2} + \hat{J}_{n,3} + I_{n,1} - 2I_{n,2} + 2I_{n,3},
\end{aligned}$$

where  $\hat{J}_{n,i}, i = 1, 2, 3$  are given by (S1.2)–(S1.4), and

$$\begin{aligned}
I_{n,1} &= \frac{1}{n^2 \bar{N}_H^2 |H|} \sum_{i=1}^n \sum_{j \neq i}^n \boldsymbol{\Delta}_i^\tau W_{ij} \boldsymbol{\Delta}_j, \\
I_{n,2} &= \frac{1}{n^2 \bar{N}_H^2 |H|} \sum_{i=1}^n \sum_{j \neq i}^n \boldsymbol{\Delta}_i^\tau W_{ij} \boldsymbol{\delta}_j, \quad \text{and} \\
I_{n,3} &= \frac{1}{n^2 \bar{N}_H^2 |H|} \sum_{i=1}^n \sum_{j \neq i}^n \boldsymbol{\Delta}_i^\tau W_{ij} \tilde{\mathbf{e}}_j.
\end{aligned}$$

In combination with the obtained results given in (S1.5)-(S1.7), it remains to show that

$$I_{n,1} \xrightarrow{p} C_\Delta > 0, \quad (\text{S1.12})$$

$$I_{n,2} = O_p \left( \frac{1}{n\bar{N}_H \sqrt{|H|}} \right), \quad (\text{S1.13})$$

$$I_{n,3} = o_p \left( \frac{1}{n\bar{N}_H \sqrt{|H|}} \right), \quad \text{and} \quad (\text{S1.14})$$

$$\hat{\sigma}_1^2 \xrightarrow{p} C_\Delta > 0 \quad (\text{S1.15})$$

under  $H_{1,C}$ . Therefore,

$$n\bar{N}_H \sqrt{|H|} \hat{J}_n / \hat{\sigma}_1 = n\bar{N}_H \sqrt{|H|} \left( I_{n,1} + O_p \left( \frac{1}{n\bar{N}_H \sqrt{|H|}} \right) \right) \rightarrow \infty$$

at the rate of  $n\bar{N}_H \sqrt{|H|}$ . Hence, the proof is finished.  $\square$

**Proof of (S1.12)**

*Proof.* It is easy to see that

$$\begin{aligned} \text{Var}(I_{n,1}) &\leq \frac{1}{n^4 \bar{N}_H^4 |H|^2} \mathbb{E} \left[ \sum_{i=1}^n \sum_{j \neq i}^n \Delta_i^\tau W_{ij} \Delta_j \right]^2 \\ &= \frac{1}{n^4 \bar{N}_H^4 |H|^2} \sum_{i=1}^n \sum_{j \neq i}^n \sum_{i'=1}^n \sum_{j' \neq i}^n \mathbb{E} [\Delta_i^\tau W_{ij} \Delta_j \Delta_{i'}^\tau W_{i'j'} \Delta_{j'}] \\ &= V_1 + V_2 + V_3 + V_4, \end{aligned}$$

where

$$\begin{aligned} V_1 &= \frac{1}{n^4 \bar{N}_H^4 |H|^2} \sum_{i=1}^n \sum_{j \neq i}^n \mathbb{E} [\Delta_i^\tau W_{ij} \Delta_j]^2, \\ V_2 &= \frac{1}{n^4 \bar{N}_H^4 |H|^2} \sum_{i=1}^n \sum_{j \neq i}^n \sum_{j' \neq i}^n \mathbb{E} [\Delta_i^\tau W_{ij} \Delta_j \Delta_i^\tau W_{ij'} \Delta_{j'}], \\ V_3 &= \frac{1}{n^4 \bar{N}_H^4 |H|^2} \sum_{i=1}^n \sum_{i'=1}^n \sum_{\substack{j \neq i \\ j \neq i'}}^n \mathbb{E} [\Delta_i^\tau W_{ij} \Delta_j \Delta_{i'}^\tau W_{i'j} \Delta_j], \quad \text{and} \end{aligned}$$

$$V_4 = \frac{1}{n^4 \bar{N}_H^4 |H|^2} \sum_{i=1}^n \sum_{i'=1}^n \sum_{j \neq i}^n \sum_{j' \neq i'}^n \mathbb{E} [\Delta_i^\tau W_{ij} \Delta_j \Delta_{i'}^\tau W_{i'j'} \Delta_{j'}].$$

It is not difficult to show that the leading term of  $V_1$  is given by

$$\begin{aligned} & \frac{1}{n^4 \bar{N}_H^4 |H|^2} \sum_{i=1}^n \sum_{j \neq i}^n \sum_{l=1}^{m_i} \sum_{v=1}^{m_j} \mathbb{E} [\Delta_{il}^2 \Delta_{jv}^2 (w_{ij}^{(l,v)})^2] \\ &= O \left( \frac{(N - n \bar{N}_2) \kappa_{22}^{p+1} |H|}{n^4 \bar{N}_H^4 |H|^2} \right) = O \left( \frac{1}{n^2 \bar{N}_H^2 |H|} \right) \end{aligned}$$

which yields  $V_1 = O \left( \frac{1}{n^2 \bar{N}_H^2 |H|} \right)$ . In the same vein, we obtain that  $V_i = o \left( \frac{1}{n^2 \bar{N}_H^2 |H|} \right)$  for  $i = 2, 3, 4$ . Therefore,  $\text{Var}(I_{n,1}) = O_p \left( \frac{1}{n^2 \bar{N}_H^2 |H|} \right) = o(1)$ , which implies that  $I_{n,1} = \mathbb{E}[I_{n,1}] + o_p(1)$ . Furthermore, we can write  $\mathbb{E}[I_{n,1}]$  as

$$\begin{aligned} \mathbb{E}[I_{n,1}] &= \frac{1}{n^2 \bar{N}_H^2 |H|} \sum_{i=1}^n \sum_{j \neq i}^n \mathbb{E} [\Delta_i^\tau W_{ij} \Delta_j] \\ &= \frac{1}{n^2 \bar{N}_H^2 |H|} \sum_{i=1}^n \sum_{j \neq i}^n \sum_{l=1}^{m_i} \sum_{v=1}^{m_j} \mathbb{E} [\Delta_{il} w_{ij}^{(l,v)} \Delta_{jv}], \end{aligned}$$

and obtain

$$\begin{aligned} & \mathbb{E} [\Delta_{il} w_{ij}^{(l,v)} \Delta_{jv}] = \mathbb{E} [\Delta(T_{il}) \Delta(T_{jv}) k_{h_C}(T_{il}, T_{jv}) K_{h_A}(X_{il}, X_{jv})] \\ &= \int \Delta(t_1) \Delta(t_2) k \left( \frac{t_1 - t_2}{h_C} \right) \prod_{k=1}^p k \left( \frac{x_{1,k} - x_{2,k}}{h_A} \right) f_T(t_1) f_T(t_2) \\ & \quad \prod_{k=1}^p f_k(x_{1,k}) f_k(x_{2,k}) dt_1 dt_2 \prod_{k=1}^p dx_{1,k} dx_{2,k} \\ &= |H| \int \Delta(t_2 + h_C z) \Delta(t_2) k(z) \prod_{k=1}^p k(v_k) f_T(t_2 + h_C z) f_T(t_2) dz dt_2 \prod_{k=1}^p dv_k dX_{2,k} \\ &= |H| \mathbb{E} \left[ \Delta^2(T, \mathbf{Z}, \mathbf{X}) f_T(T) \frac{\prod_{k=1}^p f_k^2(X_k)}{f(X_1, \dots, X_k)} \right] := |H| C_\Delta. \end{aligned}$$

Since  $C_\Delta$  is positive under  $H_1$ , we obtain that  $\mathbb{E}[I_{n,1}] = \frac{n(n-1) \bar{N}_H^2 |H|}{n^2 \bar{N}_H^2 |H|} C_\Delta \rightarrow C_\Delta > 0$ , which yields (S1.12).  $\square$

**Proof of (S1.13)**

*Proof.* It is easy to see that

$$\begin{aligned}\text{Var}(I_{n,2}) &\leq \text{E}[I_{n,2}^2] = \frac{1}{n^4 \bar{N}_{\text{H}}^4 |H|^2} \text{E} \left[ \sum_{i=1}^n \sum_{j \neq i}^n \Delta_i^\tau W_{ij} \boldsymbol{\delta}_j \right]^2 \\ &= \frac{1}{n^4 \bar{N}_{\text{H}}^4 |H|^2} \sum_{i=1}^n \sum_{i'=1}^n \sum_{j \neq i}^{m_i} \sum_{j' \neq i'}^{m_j} \text{E} [\Delta_i^\tau W_{ij} \boldsymbol{\delta}_j \Delta_{i'}^\tau W_{i'j'} \boldsymbol{\delta}_{j'}].\end{aligned}$$

Similar to the proof of (S1.12), it can be shown that  $\text{Var}(I_{n,2}) = O_p\left(\frac{1}{n^2 \bar{N}_{\text{H}}^2 |H|}\right)$ . Hence, (S1.13) holds because  $\text{E}[I_{n,2}] = 0$ .  $\square$

**Proof of (S1.14)**

*Proof.* From (S1.11), we can write  $I_{n,3} = I_{n,31} + I_{n,32} + I_{n,33} + I_{n,34}$ , where

$$\begin{aligned}I_{n,31} &= \frac{1}{n^2 \bar{N}_{\text{H}}^2 |H|} \sum_{i=1}^n \sum_{j \neq i}^n \Delta_i^\tau W_{ij} \mathbf{Z}_{ij}^\tau (\tilde{\boldsymbol{\alpha}}_0 - \boldsymbol{\alpha}_0), \\ I_{n,32} &= \frac{1}{n^2 \bar{N}_{\text{H}}^2 |H|} \sum_{i=1}^n \sum_{j \neq i}^n \Delta_i^\tau W_{ij} (\tilde{\alpha}_k - \alpha_k) \boldsymbol{\beta}_{j,k}, \\ I_{n,33} &= \frac{1}{n^2 \bar{N}_{\text{H}}^2 |H|} \sum_{i=1}^n \sum_{j \neq i}^n \Delta_i^\tau W_{ij} \alpha_k (\hat{\boldsymbol{\beta}}_{j,k} - \boldsymbol{\beta}_{j,k}), \quad \text{and} \\ I_{n,34} &= \frac{1}{n^2 \bar{N}_{\text{H}}^2 |H|} \sum_{i=1}^n \sum_{j \neq i}^n \Delta_i^\tau W_{ij} (\tilde{\alpha}_k - \alpha_k) (\hat{\boldsymbol{\beta}}_{j,k} - \boldsymbol{\beta}_{j,k}).\end{aligned}$$

By Lemma 1, we have

$$\begin{aligned}\text{Var}(I_{n,31}) &\leq \frac{1}{n^5 \bar{N}_{\text{H}}^4 |H|^2} \sum_{i=1}^n \sum_{j \neq i}^n \text{E} [\Delta_i^\tau W_{ij} \mathbf{Z}_{ij} \mathbf{1}_{m_j}]^2 \\ &\leq C \frac{1}{n^5 \bar{N}_{\text{H}}^4 |H|^2} \sum_{i=1}^n \sum_{j \neq i}^n \sum_{l=1}^{m_i} \sum_{v=1}^{m_j} \sum_{l=1}^{m_i} \sum_{v=1}^{m_j} \text{E} [\Delta_{il} \Delta_{il'} w_{ij}^{(l,v)} w_{ij}^{(l',v')}] \\ &= O_p \left( \frac{n(n-1) \bar{N}_{\text{H}}^2 |H|}{n^5 \bar{N}_{\text{H}}^4 |H|^2} \right) + o_p(1) \\ &= o_p \left( \frac{1}{n^2 \bar{N}_{\text{H}}^2 |H|} \right).\end{aligned}$$

It follows that  $E|I_{n,31}| \leq o_p\left(\frac{1}{n\bar{N}_H\sqrt{|H|}}\right)$ , which leads to  $I_{n,31} = o_p\left(\frac{1}{n\bar{N}_H\sqrt{|H|}}\right)$ . Similarly, we get  $I_{n,32} = o_p\left(\frac{1}{n\bar{N}_H\sqrt{|H|}}\right)$ . Combining with Theorem 3 in Liu et al. (2022), we obtain that

$$\begin{aligned} I_{n,33} &= \frac{1}{n^2\bar{N}_H^2|H|} \sum_{i=1}^n \sum_{j \neq i}^n \Delta_i^\tau W_{ij} \alpha_k \left\{ O(h_A^2) + O_p\left(\sqrt{\frac{1}{n\bar{N}_H h_A} + \frac{1}{n}}\right) \right\} \\ &= o_p\left(\frac{1}{n\bar{N}_H\sqrt{|H|}}\right), \end{aligned} \quad (S1.16)$$

which also implies that  $I_{n,34} = o_p\left(\frac{1}{n\bar{N}_H\sqrt{|H|}}\right)$ . Thus, we complete the proof of (S1.14).  $\square$

**Proof of (S1.15)**

*Proof.* From the proof of above, the leading term of  $\hat{\sigma}_1$  under  $H_1$  is decided by

$$\frac{1}{n^2\bar{N}_H^2|H|} \sum_{i=1}^n \sum_{j \neq i}^n \sum_{l=1}^{m_i} \sum_{v=1}^{m_j} \Delta_{il}^2 \Delta_{jv}^2 \{w_{ij}^{(l,v)}\}^2 = \frac{n(n-1)\bar{N}_H^2|H|}{n^2\bar{N}_H^2|H|} C + o_p(1) \xrightarrow{p} C > 0, \quad (S1.17)$$

where  $C = \kappa_{22}^{p+1} E\left[\Delta^4(T, \mathbf{Z}, \mathbf{X}) f_T(T) \frac{\prod_{k=1}^p f_k^2(X_k)}{f(X_1, \dots, X_k)}\right] > 0$  under  $H_{1,C}$ . Hence the proof.  $\square$

**Proof of Theorem 3**

*Proof.* Let  $\tilde{\mathbf{d}}_i = \tilde{\mathbf{h}}_{0,i} - \mathbf{h}_{0,i}$ , where

$$\begin{aligned} \mathbf{h}_{0,i} &= \{h_0(T_{i1}, \mathbf{Z}_{i1}, \mathbf{X}_{i1}; \boldsymbol{\alpha}), \dots, h_0(T_{im_i}, \mathbf{Z}_{im_i}, \mathbf{X}_{im_i}; \boldsymbol{\alpha})\}^\tau \quad \text{and} \\ \tilde{\mathbf{h}}_{0,i} &= \{h_0(T_{i1}, \mathbf{Z}_{i1}, \mathbf{X}_{i1}; \tilde{\boldsymbol{\alpha}}), \dots, h_0(T_{im_i}, \mathbf{Z}_{im_i}, \mathbf{X}_{im_i}; \tilde{\boldsymbol{\alpha}})\}^\tau. \end{aligned}$$

Notice that  $\hat{\boldsymbol{\zeta}}_i = \mathbf{Y}_i - \tilde{\mathbf{h}}_{0,i} = \boldsymbol{\delta}_i - (\tilde{\mathbf{h}}_{0,i} - \mathbf{h}_{0,i}) = \boldsymbol{\delta}_i - \tilde{\mathbf{d}}_i$ , then, we can write  $\hat{I}_n = \hat{J}_{n,1} - 2\hat{I}_{n,2} + \hat{I}_{n,3}$ , where  $\hat{J}_{n,1}$  is defined in the proof of Theorem 2, and

$$\begin{aligned} \hat{I}_{n,2} &= \frac{1}{n^2\bar{N}_H^2|H|} \sum_{i=1}^n \sum_{j \neq i}^n \boldsymbol{\delta}_i^\tau W_{ij} \tilde{\mathbf{d}}_j, \quad \text{and} \\ \hat{I}_{n,3} &= \frac{1}{n^2\bar{N}_H^2|H|} \sum_{i=1}^n \sum_{j \neq i}^n \tilde{\mathbf{d}}_i^\tau W_{ij} \tilde{\mathbf{d}}_j. \end{aligned}$$

We have show that  $\frac{n^2 \bar{N}_H^2}{\sqrt{N^2 - n \bar{N}_2}} \sqrt{|H|} \hat{J}_{n,1} / \sigma_1 \xrightarrow{D} N(0, 1)$ . Since the  $j$ -th elements of  $\tilde{\mathbf{d}}_i$  is given by  $\mathbf{Z}_{ij}^\tau (\tilde{\alpha}_0(T_{ij}) - \alpha_0(T_{ij})) + \sum_{k=1}^p (\tilde{\alpha}_k(T_{ij}) - \alpha_k(T_{ij})) X_{ij,k}$ , we can write  $\hat{I}_{n,2} = \hat{I}_{n,21} + \hat{I}_{n,22}$  with

$$\begin{aligned} \hat{I}_{n,21} &= \frac{1}{n^2 \bar{N}_H^2 |H|} \sum_{i=1}^n \sum_{j \neq i}^n \sum_{l=1}^{m_i} \sum_{j=1}^{m_j} \delta_{il} \mathbf{Z}_{jv}^\tau (\tilde{\alpha}_k(T_{jv}) - \alpha_0(T_{jv})) w_{ij}^{(l,v)} \quad \text{and} \\ \hat{I}_{n,22} &= \frac{1}{n^2 \bar{N}_H^2 |H|} \sum_{i=1}^n \sum_{j \neq i}^n \sum_{l=1}^{m_i} \sum_{j=1}^{m_j} \delta_{il} (\alpha_k(T_{jv}) - \alpha_k(T_{jv})) X_{jv,k} w_{ij}^{(l,v)}. \end{aligned}$$

Similar to the procedure of Zhang and Wang (2016), it can be shown that  $\tilde{\alpha}_0(t) - \alpha_0(t) = O_p\left(\sqrt{\frac{1}{n \bar{N}_H h_C}} + \frac{1}{n}\right)$  and  $\hat{\alpha}_k(t) - \alpha_k(t) = O_p\left(\sqrt{\frac{1}{n \bar{N}_H h_C}} + \frac{1}{n}\right)$ . Similarly, we obtain that  $\hat{I}_{n,21} = o_p\left(\frac{1}{n \bar{N}_H \sqrt{|H|}}\right)$  and  $\hat{I}_{n,22} = o_p\left(\frac{1}{n \bar{N}_H \sqrt{|H|}}\right)$ . That is,  $\hat{I}_{n,2} = o_p\left(\frac{1}{n \bar{N}_H \sqrt{|H|}}\right)$ .

Furthermore, we can rewrite  $\hat{I}_{n,3} = \hat{I}_{n,31} + \hat{I}_{n,32} + \hat{I}_{n,33}$ , where

$$\begin{aligned} \hat{I}_{n,31} &= \frac{1}{n^2 \bar{N}_H^2 |H|} \sum_{i=1}^n \sum_{j \neq i}^n \sum_{l=1}^{m_i} \sum_{j=1}^{m_j} (\tilde{\alpha}_0(T_{il}) - \alpha_0(T_{il})) \mathbf{Z}_{il}^\tau w_{ij}^{(l,v)} (\tilde{\alpha}_0(T_{jv}) - \alpha_0(T_{jv})) \mathbf{Z}_{jv}, \\ \hat{I}_{n,32} &= \frac{1}{n^2 \bar{N}_H^2 |H|} \sum_{i=1}^n \sum_{j \neq i}^n \sum_{l=1}^{m_i} \sum_{j=1}^{m_j} (\tilde{\alpha}_k(T_{il}) - \alpha_k(T_{il})) w_{ij}^{(l,v)} (\tilde{\alpha}_k(T_{jv}) - \alpha_k(T_{jv})), \quad \text{and} \\ \hat{I}_{n,33} &= \frac{1}{n^2 \bar{N}_H^2 |H|} \sum_{k=1}^p \sum_{i=1}^n \sum_{j \neq i}^n \sum_{l=1}^{m_i} \sum_{j=1}^{m_j} (\tilde{\alpha}_0(T_{il}) - \alpha_0(T_{il}))^\tau \mathbf{Z}_{il} w_{ij}^{(l,v)} (\tilde{\alpha}_k(T_{jv}) - \alpha_k(T_{jv})). \end{aligned}$$

It is routine to show that  $\hat{I}_{n,3l} = o_p\left(\frac{1}{n \bar{N}_H \sqrt{|H|}}\right)$  for  $l = 1, 2, 3$ , which means that  $\hat{I}_{n,3} = o_p\left(\frac{1}{n \bar{N}_H \sqrt{|H|}}\right)$ . Therefore, it follows that

$$\frac{n^2 \bar{N}_H^2}{\sqrt{N^2 - n \bar{N}_2}} \sqrt{|H|} \hat{I}_n / \hat{\sigma}_1 = \frac{\sigma_1}{\hat{\sigma}_1} \frac{n^2 \bar{N}_H^2}{\sqrt{N^2 - n \bar{N}_2}} \sqrt{|H|} \hat{I}_{n,1} / \sigma_1 + o_p(1) \xrightarrow{D} N(0, 1),$$

which completes the proof.  $\square$

**Proof of Theorem 4.**

*Proof.* Under  $H_{1,A}$ ,

$$\hat{\varsigma}_{ij} = Y_{ij} - h_0(T_{ij}, \mathbf{Z}_{ij}, \mathbf{X}_{ij}; \tilde{\alpha}(T_{ij})) = \tilde{\Delta}(T_{ij}, \mathbf{Z}_{ij}, \mathbf{X}_{ij}) - \tilde{d}_{ij} + \delta_{ij},$$

where  $\tilde{\Delta}(t, \mathbf{z}, \mathbf{x}) = g(t, \mathbf{z}, \mathbf{x}; \alpha(t), \beta(\mathbf{x})) - h_0(t, \mathbf{z}, \mathbf{x}; \alpha(t))$ . Let  $\tilde{\Delta}_i = (\tilde{\Delta}_{i1}, \dots, \tilde{\Delta}_{im_i})^\tau$  with  $\tilde{\Delta}_{ij} := \tilde{\Delta}(T_{ij}, \mathbf{Z}_{ij}, \mathbf{X}_{ij})$ , then

$$\hat{I}_n = \hat{J}_{n,1} - 2\hat{I}_{n,2} + \hat{I}_{n,3} + \tilde{I}_{n,1} - 2\tilde{I}_{n,2} + 2\tilde{I}_{n,3},$$

where

$$\begin{aligned}\tilde{I}_{n,1} &= \frac{1}{n^2 \bar{N}_H^2 |H|} \sum_{k=1}^p \sum_{i=1}^n \sum_{j \neq i}^n \tilde{\Delta}_i^\tau W_{ij} \tilde{\Delta}_j, \\ \tilde{I}_{n,2} &= \frac{1}{n^2 \bar{N}_H^2 |H|} \sum_{i=1}^n \sum_{j \neq i}^n \tilde{\Delta}_i^\tau W_{ij} \delta_j, \quad \text{and} \\ \tilde{I}_{n,3} &= \frac{1}{n^2 \bar{N}_H^2 |H|} \sum_{i=1}^n \sum_{j \neq i}^n \tilde{\Delta}_i^\tau W_{ij} \tilde{d}_i.\end{aligned}$$

In the vein of Theorem 2, we can show that

$$\tilde{I}_{n,1} = E[\tilde{I}_{n,1}] + o_p(1) \rightarrow E \left[ \tilde{\Delta}^2(T, \mathbf{Z}, \mathbf{X}) f_T(T) \frac{\prod_{k=1}^p f_k^2(X_k)}{f(X_1, \dots, X_k)} \right] > 0$$

and  $\tilde{I}_{n,2} = O_p\left(\frac{1}{n \bar{N}_H \sqrt{|H|}}\right)$ . On the other hand, note that  $\tilde{I}_{n,3} = \tilde{I}_{n,31} + \tilde{I}_{n,32}$  with

$$\begin{aligned}\tilde{I}_{n,31} &= \frac{1}{n^2 \bar{N}_H^2 |H|} \sum_{i=1}^n \sum_{j \neq i}^n \tilde{\Delta}_i^\tau W_{ij} \mathbf{Z}_{ij}^\tau (\tilde{\alpha}_0(T_{ij}) - \alpha_0(T_{ij})) \quad \text{and} \\ \tilde{I}_{n,32} &= \frac{1}{n^2 \bar{N}_H^2 |H|} \sum_{k=1}^p \sum_{i=1}^n \sum_{j \neq i}^n \tilde{\Delta}_i^\tau W_{ij} (\tilde{\alpha}_k(T_{ij}) - \alpha_k(T_{ij})) X_{ijk}.\end{aligned}$$

Along with the line of (S1.14), we have  $\tilde{I}_{n,3i} = o_p\left(\frac{1}{n \bar{N}_H \sqrt{|H|}}\right)$  for  $i = 1, 2$ , which yields  $\hat{I}_{n,3} = o_p\left(\frac{1}{n \bar{N}_H \sqrt{|H|}}\right)$ . In combination with (S1.5) and (S1.8), we obtain that

$$n \bar{N}_H \sqrt{|H|} \hat{I}_n / \hat{\sigma}_1 = n \bar{N}_H \sqrt{|H|} \left( \tilde{I}_{n,1} + O_p\left(\frac{1}{n \bar{N}_H \sqrt{|H|}}\right) \right) \rightarrow \infty$$

at the rate of  $n \bar{N}_H \sqrt{|H|}$ . □

## References

- Jun, S. J., Pinkse, J., 2012. Testing under weak identification with conditional moment restrictions. *Econometric Theory* 28 (6), 1229–1282.
- Liu, S., You, J., Hu, L., 2022. Unified statistical inference for a nonlinear dynamic functional/longitudinal data model. *Journal of Statistical Planning and Inference* 219, 175–188.
- Zhang, X., Wang, J.-L., 2016. From sparse to dense functional data and beyond. *The Annals of Statistics* 44 (5), 2281–2321.
